# Supplementary material
Source: PubMed Central journal article supplement (PMC8549432)

---

**Supplementary information**

---

**A synthetic antibiotic class overcoming  
bacterial multidrug resistance**

---

In the format provided by the  
authors and unedited

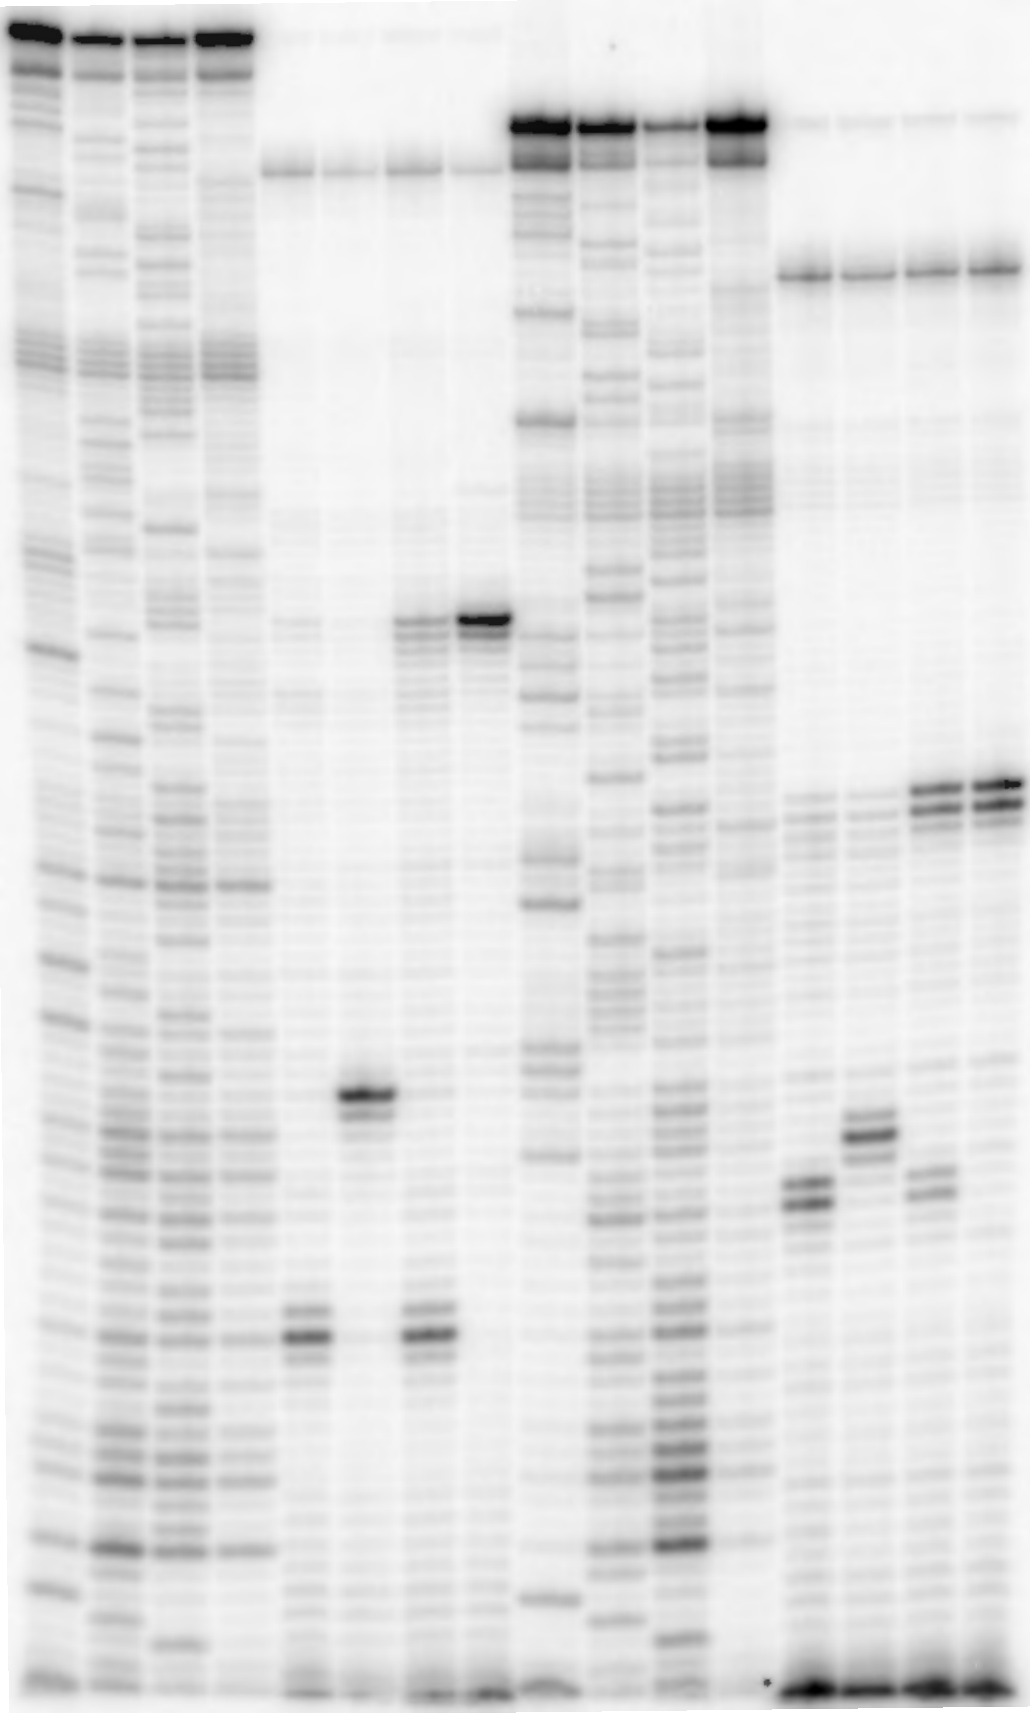

Supplement: 41586_2021_4045_MOESM1_ESM.pdf [file 41586_2021_4045_MOESM1_ESM.pdf]
